# Supplementary material for: The Damaging Effect of Leaks: How the Mode of Information Disclosure Shapes Citizens’ Trust
Source: Research Square preprint supplement (doi:10.21203/rs.3.rs-8703978/v1), 2026-02-16
Supplement: Supplementary file 1 [file fe6d853dbd88787c6b5f6c70.docx]

**Online Appendix for**

***The Damaging Effect of Leaks: How the Mode
of Information Disclosure Shapes Citizens’ Trust***

**Contents**

[A1 Original language used in the experiment 2](#_Toc220355730)

[A2 Balance tests of experimental conditions 4](#_Toc220355731)

[A4 Manipulation check 5](#_Toc220355732)

[A3 Models underlying figures 7](#_Toc220355733)

[A5 Trust in media and the information disclosure mode 13](#_Toc220355734)

[A6 Sociodemographics and the information disclosure mode 15](#_Toc220355735)

[A6.1 Gender 15](#_Toc220355736)

[A6.2 Age 17](#_Toc220355737)

[A6.3 Education 19](#_Toc220355738)

[A6.4 Income situation 21](#_Toc220355739)

[A6.5 Ideology 23](#_Toc220355740)

[References 25](#_Toc220355741)

# A1 Original language used in the experiment

| Table 3 Names used for the federal councillors (ministers) | | |
| --- | --- | --- |
|  | **German** | **French** |
| **Last name** | Gerber | Rochat |
| **First name** | Daniel / Monika | Michel / Nathalie |

| Table 4 Language used in the experiment | |
| --- | --- |
| **German** | **French** |
| Nachfolgend zeigen wir Ihnen einen Auszug aus einem fiktiven Nachrichtenbeitrag. Bitte lesen Sie diesen sorgfältig durch. | Sur la page suivante, nous vous présentons un extrait d'un article d'actualité fictif. Veuillez le lire attentivement. |
| Luftverschmutzung: Gesetzesentwurf für neue Grenzwerte | Pollution atmosphérique : projet de loi pour de nouvelles valeurs limites |
| Das Wichtigste in Kürze | L'essentiel en bref |
| [Mitte-Bundesrat | Mitte-Bundesrätin] [Name] hat einen Gesetzesentwurf zur Anpassung der Grenz- und Zielwerte für verschiedene Luftschadstoffe vorgestellt. | [Le conseiller fédéral du Centre | La conseillère fédérale du Centre] [Nom] a présenté un projet de loi visant à adapter les valeurs limites et les valeurs cibles pour différents polluants atmosphériques. |
| [Er | Sie] erklärte an der Medienkonferenz, dass der Gesetzesentwurf in enger Zusammenarbeit zwischen dem Bundesamt für Umwelt (BAFU) und [Vertretern verschiedener Industrieverbände | Vertretern verschiedener Umweltverbände | Wissenschaftern verschiedener Hochschulen] ausgearbeitet wurde. | [Il | Elle] a expliqué lors de la conférence de presse que le projet de loi avait été élaboré en étroite collaboration entre l'Office fédéral de l’environnement (OFEV) et [des représentants de différentes associations industrielles | des représentants de différentes associations environnementales | des scientifiques de différentes universités]. |
| Gestützt auf das Öffentlichkeitsgesetz erhielt unsere Zeitung Einsicht in zahlreiche interne Dokumente der Bundesverwaltung. Sie zeigen, dass der Gesetzesentwurf in enger Zusammenarbeit zwischen dem Bundesamt für Umwelt (BAFU) und [Vertretern verschiedener Industrieverbände | Vertretern verschiedener Umweltverbände | Wissenschaftern verschiedener Hochschulen] ausgearbeitet wurde. | Sur la base de la loi sur la transparence, notre journal a eu accès à de nombreux documents internes de l'administration fédérale. Ils montrent que le projet de loi a été élaboré en étroite collaboration entre l'Office fédéral de l'environnement (OFEV) et [des représentants de différentes associations industrielles | des représentants de différentes associations environnementales | des scientifiques de différentes universités]. |
| Auf Grund eines Datenleck in der Bundesverwaltung hatte unsere Zeitung Einsicht in zahlreiche interne Dokumente. Sie zeigen, dass der Gesetzesentwurf in enger Zusammenarbeit zwischen dem Bundesamt für Umwelt (BAFU) und [Vertretern verschiedener Industrieverbände | Vertretern verschiedener Umweltverbände | Wissenschaftern verschiedener Hochschulen] ausgearbeitet wurde. | Suite à une fuite de données au sein de l'administration fédérale, notre journal a eu accès à de nombreux documents internes. Ils montrent que le projet de loi a été élaboré en étroite collaboration entre l'Office fédéral de l'environnement (OFEV) et [des représentants de différentes associations industrielles | des représentants de différentes associations environnementales | des scientifiques de différentes universités]. |
| Der Gesetzesentwurf geht nun in die Vernehmlassung. | Le projet de loi va maintenant être mis en consultation. |
| Nachdem Sie diesen Nachrichtenbeitrag gelesen haben, geben Sie bitte an, wie stark Sie den folgenden Aussagen zustimmen. | Après avoir lu cet article d'actualité, veuillez indiquer dans quelle mesure vous êtes d'accord avec les affirmations suivantes. |
| [Name] erscheint vertrauenswürdig. | [Nom] semble digne de confiance. |
| Der Entstehungsprozess dieses Gesetzesentwurfs erscheint vertrauenswürdig. | Le processus d’élaboration de ce projet de loi semble digne de confiance. |
| Überhaupt nicht (0) | Pas du tout (0) |
| Voll und ganz (10) | Entièrement (10) |
| Bitte denken Sie an den zuvor gezeigten Nachrichtenbeitrag zurück.  Wer arbeitete gemeinsam mit dem Bundesamt für Umwelt (BAFU) den Gesetzesentwurf aus? | S'il vous plaît, souvenez-vous du reportage présenté précédemment.  Qui a élaboré le projet de loi en collaboration avec l'Office fédéral de l'environnement (OFEV) ? |
| Wissenschafter verschiedener Hochschulen | Des scientifiques de différentes universités |
| Vertreter verschiedener Industrieverbände | Des représentants de différentes associations industrielles |
| Vertreter verschiedener Umweltverbände | Des représentants de différentes associations environnementales |
| Und wie erfuhr die Öffentlichkeit von dieser Zusammenarbeit? | Et pourquoi le public a-t-il eu connaissance de cette collaboration ? |
| [Name] legte dies an einer Medienkonferenz offen. | [Nom] l'a révélé lors d'une conférence de presse. |
| Eine Zeitung hatte gestützt auf das Öffentlichkeitsgesetz Einsicht in interne Dokumente der Bundesverwaltung erhalten. | Un journal a eu accès à des documents internes de l'administration fédérale en vertu de la loi sur la transparence. |
| Eine Zeitung hatte auf Grund eines Datenlecks Einsicht in interne Dokumente der Bundesverwaltung. | Un journal a eu accès à des documents internes de l'administration fédérale à la suite d'une fuite de données. |

| Table 5 Multinomial regression of treatment type on respondent characteristics | | | | |
| --- | --- | --- | --- | --- |
|  | **Balance tests** | | | |
|  | **Balance test 1: Communication mode** | | **Balance test 2: Type of non-state actor involved** | |
|  | **Freedom of information request**1 | **Government leak**1 | **Environmental associations**2 | **Industrial associations**2 |
| Respondent vote intention: Centre Party | -0.117 (0.174) | 0.029 (0.167) | 0.217 (0.169) | 0.070 (0.171) |
| Respondent: trust in the federal government | 0.016 (0.041) | -0.019 (0.040) | -0.069 (0.041) | -0.019 (0.040) |
| Respondent: trust in the federal administration | -0.003 (0.044) | 0.016 (0.043) | 0.044 (0.043) | -0.006 (0.043) |
| Respondent: trust in the media | 0.004 (0.030) | -0.010 (0.029) | 0.036 (0.030) | 0.006 (0.029) |
| Respondent income: get along very well3 | 0.149 (0.165) | 0.074 (0.165) | -0.140 (0.163) | -0.172 (0.160) |
| Respondent income: only manage with difficulty3 | 0.043 (0.129) | -0.138 (0.128) | 0.056 (0.128) | -0.039 (0.128) |
| Respondent income: only manage with great difficulty3 | -0.097 (0.243) | -0.392 (0.250) | -0.002 (0.253) | 0.058 (0.245) |
| Respondent: educational level (ISCED-11) | 0.051 (0.032) | 0.034 (0.032) | 0.001 (0.032) | 0.056 (0.032) |
| Respondent: woman | 0.035 (0.110) | 0.209 (0.108) | 0.119 (0.109) | 0.097 (0.107) |
| Respondent age | -0.004 (0.003) | 0.002 (0.003) | -0.003 (0.003) | 0.001 (0.003) |
| Intercept | -0.166 (0.282) | -0.236 (0.279) | -0.078 (0.280) | -0.310 (0.277) |
| AIC | 4860.343 | | 4858.219 | |
| BIC | 4985.67 | | 4983.545 | |
| Log Likelihood | -2408.172 | | -2407.109 | |
| Deviance | 4816.343 | | 4814.219 | |
| K | 3 | | 3 | |
| Notes: ***p < 0.001; **p < 0.01; *p < 0.05. N = 2201. Models reports log odds. Baselines: 1 = press conference; 2 = scientists, 3 = get along well | | | | |

# A2 Balance tests of experimental conditions

# A4 Manipulation check

Following the experiment, respondents were asked to recall the attribute levels presented in the vignette. First, they were asked to identify who had co-drafted the bill with the Federal Office for the Environment, with response options “scientists from various universities,” “representatives from various environmental associations,” and “representatives from various industrial associations.” Second, respondents were asked how the public became aware of this collaboration, with the following options: “[Minister] disclosed this at a press conference,” “a newspaper gained access to internal documents of the federal administration through the Freedom of Information Act,” and “a newspaper gained access to internal documents of the federal administration through a data leak.”

The results indicate that respondents more accurately recalled the mode of information disclosure than the type of non-state actors involved. Overall, 66.0% of respondents correctly remembered the disclosure mode, whereas 55.8% correctly recalled the type of non-state actors. In total, 41.4% of respondents accurately recalled both experimental treatments.

As Table 6 shows, recall performance varies systematically across conditions. Respondents exposed to the baseline press conference scenario exhibited higher recall rates than those assigned to the freedom of information or leak conditions. Similarly, scenarios involving environmental associations were recalled more accurately than those featuring scientists or industrial associations. Moreover, recall is also shaped by respondent characteristics: across both models, more left-leaning, more highly educated, and older respondents exhibit higher levels of recall accuracy.

| Table 6 Determinants of correct recall of experimental treatments | | |
| --- | --- | --- |
|  | **Recall: disclosure mode** | **Recall: non-state actor type** |
| Scenario: freedom of information request1 | -1.189 (0.119)*** | -0.062 (0.114) |
| Scenario: government leak1 | -0.601 (0.120)*** | -0.007 (0.113) |
| Actor: environmental associations2 | -0.140 (0.115) | 1.387 (0.120)*** |
| Actor: industrial associations2 | -0.066 (0.114) | -0.520 (0.106)*** |
| Respondent: Left-right ideology | -0.070 (0.021)** | -0.058 (0.021)** |
| Respondent income: get along very well**3** | -0.174 (0.145) | 0.048 (0.144) |
| Respondent income: only manage with difficulty**3** | -0.008 (0.115) | -0.081 (0.113) |
| Respondent income: only manage with great difficulty**3** | -0.390 (0.215) | 0.142 (0.219) |
| Respondent: education (ISCED-11) | 0.138 (0.029)*** | 0.088 (0.028)** |
| Respondent: woman | -0.018 (0.098) | -0.150 (0.097) |
| Respondent: age | 0.013 (0.003)*** | 0.007 (0.003)* |
| Intercept | 0.558 (0.263)* | -0.265 (0.259) |
| Notes: ***p < 0.001; **p < 0.01; *p < 0.05. N = 2201. Baselines: 1 = press conference; 2 = scientists, 3 = get along well | | |

# A3 Models underlying figures

| Table 7 Voters’ trust in the minister and the policy formulation process (Figure 1) | | |
| --- | --- | --- |
|  | **Trust in minister** | **Trust in policy formulation process** |
| Disclosure: freedom of information request1 | 0.053 (0.099) | 0.003 (0.100) |
| Disclosure: government leak1 | -0.694 (0.098)*** | -0.757 (0.098)*** |
| Trust in depicted non-state actors | 0.196 (0.021)*** | 0.286 (0.021)*** |
| Respondent vote intention: Centre Party | -0.101 (0.130) | -0.429 (0.131)** |
| Gender homophily between minister and respondent | -0.058 (0.080) | -0.019 (0.081) |
| Language homophily between minister and respondent | 0.076 (0.080) | 0.067 (0.081) |
| Respondent: trust in the federal government | 0.181 (0.031)*** | 0.120 (0.031)*** |
| Respondent: trust in the federal administration | 0.123 (0.034)*** | 0.083 (0.034)* |
| Respondent: trust in the media | 0.095 (0.023)*** | 0.134 (0.023)*** |
| Respondent income: get along very well2 | -0.087 (0.125) | 0.104 (0.126) |
| Respondent income: only manage with difficulty2 | -0.146 (0.099) | -0.081 (0.100) |
| Respondent income: only manage with great difficulty2 | -0.553 (0.191)** | -0.543 (0.192)** |
| Respondent: educational level (ISCED-11) | -0.032 (0.025) | -0.027 (0.025) |
| Respondent: woman | -0.003 (0.084) | -0.099 (0.084) |
| Respondent: age | 0.002 (0.003) | -0.002 (0.003) |
| Intercept | 2.438 (0.233)*** | 2.665 (0.234)*** |
| R2 / Adj. R2 | 0.322 / 0.318 | 0.337 / 0.333 |
| Notes: ***p < 0.001; **p < 0.01; *p < 0.05. N = 2201. Baselines: 1 = press conference; 2 = get along well | | |

| Table 8 Voters’ trust in the minister and the policy formulation process (Figure 2) | | | | |
| --- | --- | --- | --- | --- |
|  | **Trust in minister** | **Trust in minister** | **Trust in policy formulation process** | **Trust in policy formulation process** |
| Disclosure: freedom of information request**1** | 0.094 (0.168) | 0.051 (0.241) | -0.037 (0.172) | -0.270 (0.243) |
| Disclosure: government leak**1** | -0.703 (0.166)*** | -0.746 (0.241)** | -0.658 (0.170)*** | -1.018 (0.242)*** |
| Representatives of environmental associations**2** | -0.203 (0.173) |  | -0.369 (0.177)* |  |
| Representatives of industrial associations**2** | -0.245 (0.171) |  | -0.467 (0.175)** |  |
| Disclosure: freedom of information request**1** × Representatives of environmental associations**2** | -0.065 (0.245) |  | 0.081 (0.251) |  |
| Disclosure: government leak**1** × Representatives of environmental associations**2** | 0.193 (0.245) |  | 0.019 (0.250) |  |
| Disclosure: freedom of information request**1** × Representatives of industrial associations**2** | -0.074 (0.245) |  | 0.028 (0.251) |  |
| Disclosure: government leak**1** × Representatives of industrial associations2 | -0.179 (0.239) |  | -0.343 (0.245) |  |
| Trust in depicted non-state actors |  | 0.193 (0.032)*** |  | 0.252 (0.032)*** |
| Disclosure: freedom of information request**1** × Trust in depicted non-state actors |  | 0.000 (0.041) |  | 0.051 (0.041) |
| Disclosure: government leak**1** × Trust in depicted non-state actors |  | 0.010 (0.042) |  | 0.049 (0.042) |
| Respondent vote intention: Centre Party | -0.123 (0.133) | -0.101 (0.130) | -0.459 (0.136)*** | -0.430 (0.131)** |
| Gender homophily between minister and respondent | -0.074 (0.082) | -0.059 (0.080) | -0.043 (0.084) | -0.020 (0.081) |
| Language homophily between minister and respondent | 0.075 (0.082) | 0.076 (0.080) | 0.067 (0.084) | 0.064 (0.081) |
| Respondent: trust in the federal government | 0.201 (0.032)*** | 0.181 (0.031)*** | 0.148 (0.032)*** | 0.119 (0.031)*** |
| Respondent: trust in the federal administration | 0.189 (0.034)*** | 0.123 (0.034)*** | 0.178 (0.035)*** | 0.083 (0.034)* |
| Respondent: trust in the media | 0.138 (0.023)*** | 0.095 (0.023)*** | 0.198 (0.024)*** | 0.134 (0.023)*** |
| Respondent income: get along very well**3** | -0.101 (0.127) | -0.088 (0.125) | 0.068 (0.130) | 0.099 (0.126) |
| Respondent income: only manage with difficulty**3** | -0.141 (0.101) | -0.147 (0.099) | -0.074 (0.103) | -0.088 (0.100) |
| Respondent income: only manage with great difficulty**3** | -0.552 (0.195)** | -0.555 (0.192)** | -0.530 (0.199)** | -0.565 (0.193)** |
| Respondent: educational level (ISCED-11) | -0.014 (0.025) | -0.031 (0.025) | 0.001 (0.026) | -0.027 (0.025) |
| Respondent: woman | -0.021 (0.085) | -0.003 (0.084) | -0.118 (0.087) | -0.096 (0.084) |
| Respondent: age | 0.001 (0.003) | 0.002 (0.003) | -0.004 (0.003) | -0.002 (0.003) |
| Intercept | 2.976 (0.251)*** | 2.455 (0.269)*** | 3.494 (0.257)*** | 2.852 (0.270)*** |
| R2 / Adj. R2 | 0.300 / 0.293 | 0.322 / 0.317 | 0.294 / 0.287 | 0.338 / 0.333 |
| Notes: ***p < 0.001; **p < 0.01; *p < 0.05. N = 2201. Baselines: 1 = press conference; 2 = scientists from universities, 3 = get along well | | | | |

| Table 9 Voters’ trust in the minister and the policy formulation process (Figure 3) | | |
| --- | --- | --- |
|  | **Trust in minister** | **Trust in policy formulation process** |
| Disclosure: freedom of information request | -0.207 (0.341) | -0.685 (0.343)* |
| Disclosure: government leak | -1.334 (0.345)*** | -1.533 (0.347)*** |
| Non-state actors: representatives of different environmental associations | -0.295 (0.359) | -0.592 (0.361) |
| Non-state actors: representatives of different industrial associations | -0.490 (0.352) | -0.679 (0.354) |
| Respondent policy priority (environment-economy) | -0.143 (0.044)** | -0.189 (0.045)*** |
| Trust in depicted non-state actors | 0.204 (0.024)*** | 0.281 (0.024)*** |
| Gender homophily between minister and respondent | -0.066 (0.080) | -0.041 (0.081) |
| Language homophily between minister and respondent | 0.077 (0.080) | 0.078 (0.081) |
| Respondent: trust in the federal government | 0.184 (0.031)*** | 0.116 (0.031)*** |
| Respondent: trust in the federal administration | 0.114 (0.034)*** | 0.079 (0.034)* |
| Respondent: trust in the media | 0.089 (0.023)*** | 0.132 (0.023)*** |
| Respondent income: get along very well | -0.076 (0.125) | 0.088 (0.126) |
| Respondent income: only manage with difficulty | -0.167 (0.099) | -0.097 (0.100) |
| Respondent income: only manage with great difficulty | -0.582 (0.191)** | -0.559 (0.192)** |
| Respondent: educational level (ISCED-11) | -0.032 (0.025) | -0.024 (0.025) |
| Respondent: woman | -0.043 (0.085) | -0.140 (0.085) |
| Respondent: age | 0.002 (0.003) | -0.002 (0.003) |
| Disclosure: freedom of information request × Non-state actors: representatives of different environmental associations | -0.084 (0.501) | 0.723 (0.504) |
| Disclosure: government leak × Non-state actors: representatives of different environmental associations | 0.600 (0.503) | 0.805 (0.506) |
| Disclosure: freedom of information request × Non-state actors: representatives of different industrial associations | 0.713 (0.504) | 0.936 (0.506) |
| Disclosure: government leak × Non-state actors: representatives of different industrial associations | 0.172 (0.485) | -0.190 (0.487) |
| Disclosure: freedom of information request × Respondent policy priority (environment-economy) | 0.070 (0.063) | 0.149 (0.064)* |
| Disclosure: government leak × Respondent policy priority (environment-economy) | 0.148 (0.064)* | 0.206 (0.064)** |
| Non-state actors: representatives of different environmental associations × Respondent policy priority (environment-economy) | 0.092 (0.069) | 0.147 (0.069)* |
| Non-state actors: representatives of different industrial associations × Respondent policy priority (environment-economy) | 0.140 (0.064)* | 0.166 (0.065)* |
| Disclosure: freedom of information request × Non-state actors: representatives of different environmental associations × Respondent policy priority (environment-economy) | -0.002 (0.095) | -0.151 (0.096) |
| Disclosure: government leak × Non-state actors: representatives of different environmental associations × Respondent policy priority (environment-economy) | -0.106 (0.096) | -0.197 (0.096)* |
| Disclosure: freedom of information request × Non-state actors: representatives of different industrial associations × Respondent policy priority (environment-economy) | -0.179 (0.095) | -0.209 (0.095)* |
| Disclosure: government leak × Non-state actors: representatives of different industrial associations × Respondent policy priority (environment-economy) | -0.089 (0.091) | -0.051 (0.091) |
| Intercept | 3.033 (0.335)*** | 3.532 (0.337)*** |
| R2 / Adj. R2 | 0.330 / 0.321 | 0.346 / 0.337 |
| Notes: ***p < 0.001; **p < 0.01; *p < 0.05. N = 2201. Baselines: 1 = press conference; 2 = get along well | | |

| Table 10 Voters’ trust in the minister and the policy formulation process (Figure 4) | | |
| --- | --- | --- |
|  | **Trust in minister** | **Trust in policy formulation process** |
| Disclosure: freedom of information request**1** | 0.134 (0.105) | 0.086 (0.105) |
| Disclosure: government leak**1** | -0.653 (0.104)*** | -0.717 (0.104)*** |
| Trust in depicted non-state actors | 0.196 (0.021)*** | 0.286 (0.021)*** |
| Respondent vote intention: Centre Party | 0.268 (0.223) | -0.058 (0.224) |
| Disclosure: freedom of information request × Respondent vote intention: Centre Party | -0.767 (0.323)* | -0.785 (0.325)* |
| Disclosure: government leak × Respondent vote intention: Centre Party | -0.377 (0.310) | -0.366 (0.312) |
| Gender homophily between minister and respondent | -0.055 (0.080) | -0.016 (0.081) |
| Language homophily between minister and respondent | 0.079 (0.080) | 0.070 (0.081) |
| Respondent: trust in the federal government | 0.181 (0.031)*** | 0.120 (0.031)*** |
| Respondent: trust in the federal administration | 0.124 (0.034)*** | 0.083 (0.034)* |
| Respondent: trust in the media | 0.096 (0.023)*** | 0.135 (0.023)*** |
| Respondent income: get along very well**2** | -0.089 (0.125) | 0.101 (0.126) |
| Respondent income: only manage with difficulty**2** | -0.145 (0.099) | -0.080 (0.099) |
| Respondent income: only manage with great difficulty**2** | -0.532 (0.191)** | -0.522 (0.192)** |
| Respondent: educational level (ISCED-11) | -0.031 (0.025) | -0.026 (0.025) |
| Respondent: woman | -0.001 (0.084) | -0.097 (0.084) |
| Respondent: age | 0.002 (0.003) | -0.002 (0.003) |
| Intercept | 2.384 (0.234)*** | 2.610 (0.235)*** |
| R2 / Adj. R2 | 0.324 / 0.319 | 0.339 / 0.334 |
| Notes: ***p < 0.001; **p < 0.01; *p < 0.05. N = 2201. Baselines: 1 = press conference; 2 = get along well | | |

# A5 Trust in media and the information disclosure mode

Two of the three disclosure modes involve the press: in the freedom of information and leak scenarios, information is released through media reporting. It is therefore plausible that citizens’ trust in the media conditions their response to different modes of disclosure.

Figure 5 examines this possibility by assessing whether trust in the media moderates reactions to the three disclosure modes. The results indicate that it does not. While higher trust in the media is generally associated with greater trust in both the minister and the policy formulation process, it does not alter the relative effects of the disclosure modes. The pronounced difference between leaks and freedom of information disclosures persists across all levels of media trust, as does the absence of a difference between politician-controlled disclosure via a press conference and legally compelled disclosure following a freedom of information request. Taken together, these findings suggest that press involvement as such – the shared feature of freedom of information requests and leaks – does not shape how citizens perceive different modes of information disclosure.

| Figure 5 Marginal effects of disclosure mode × trust in the media on trust in the minister and in the policy formulation process. |
| --- |
| **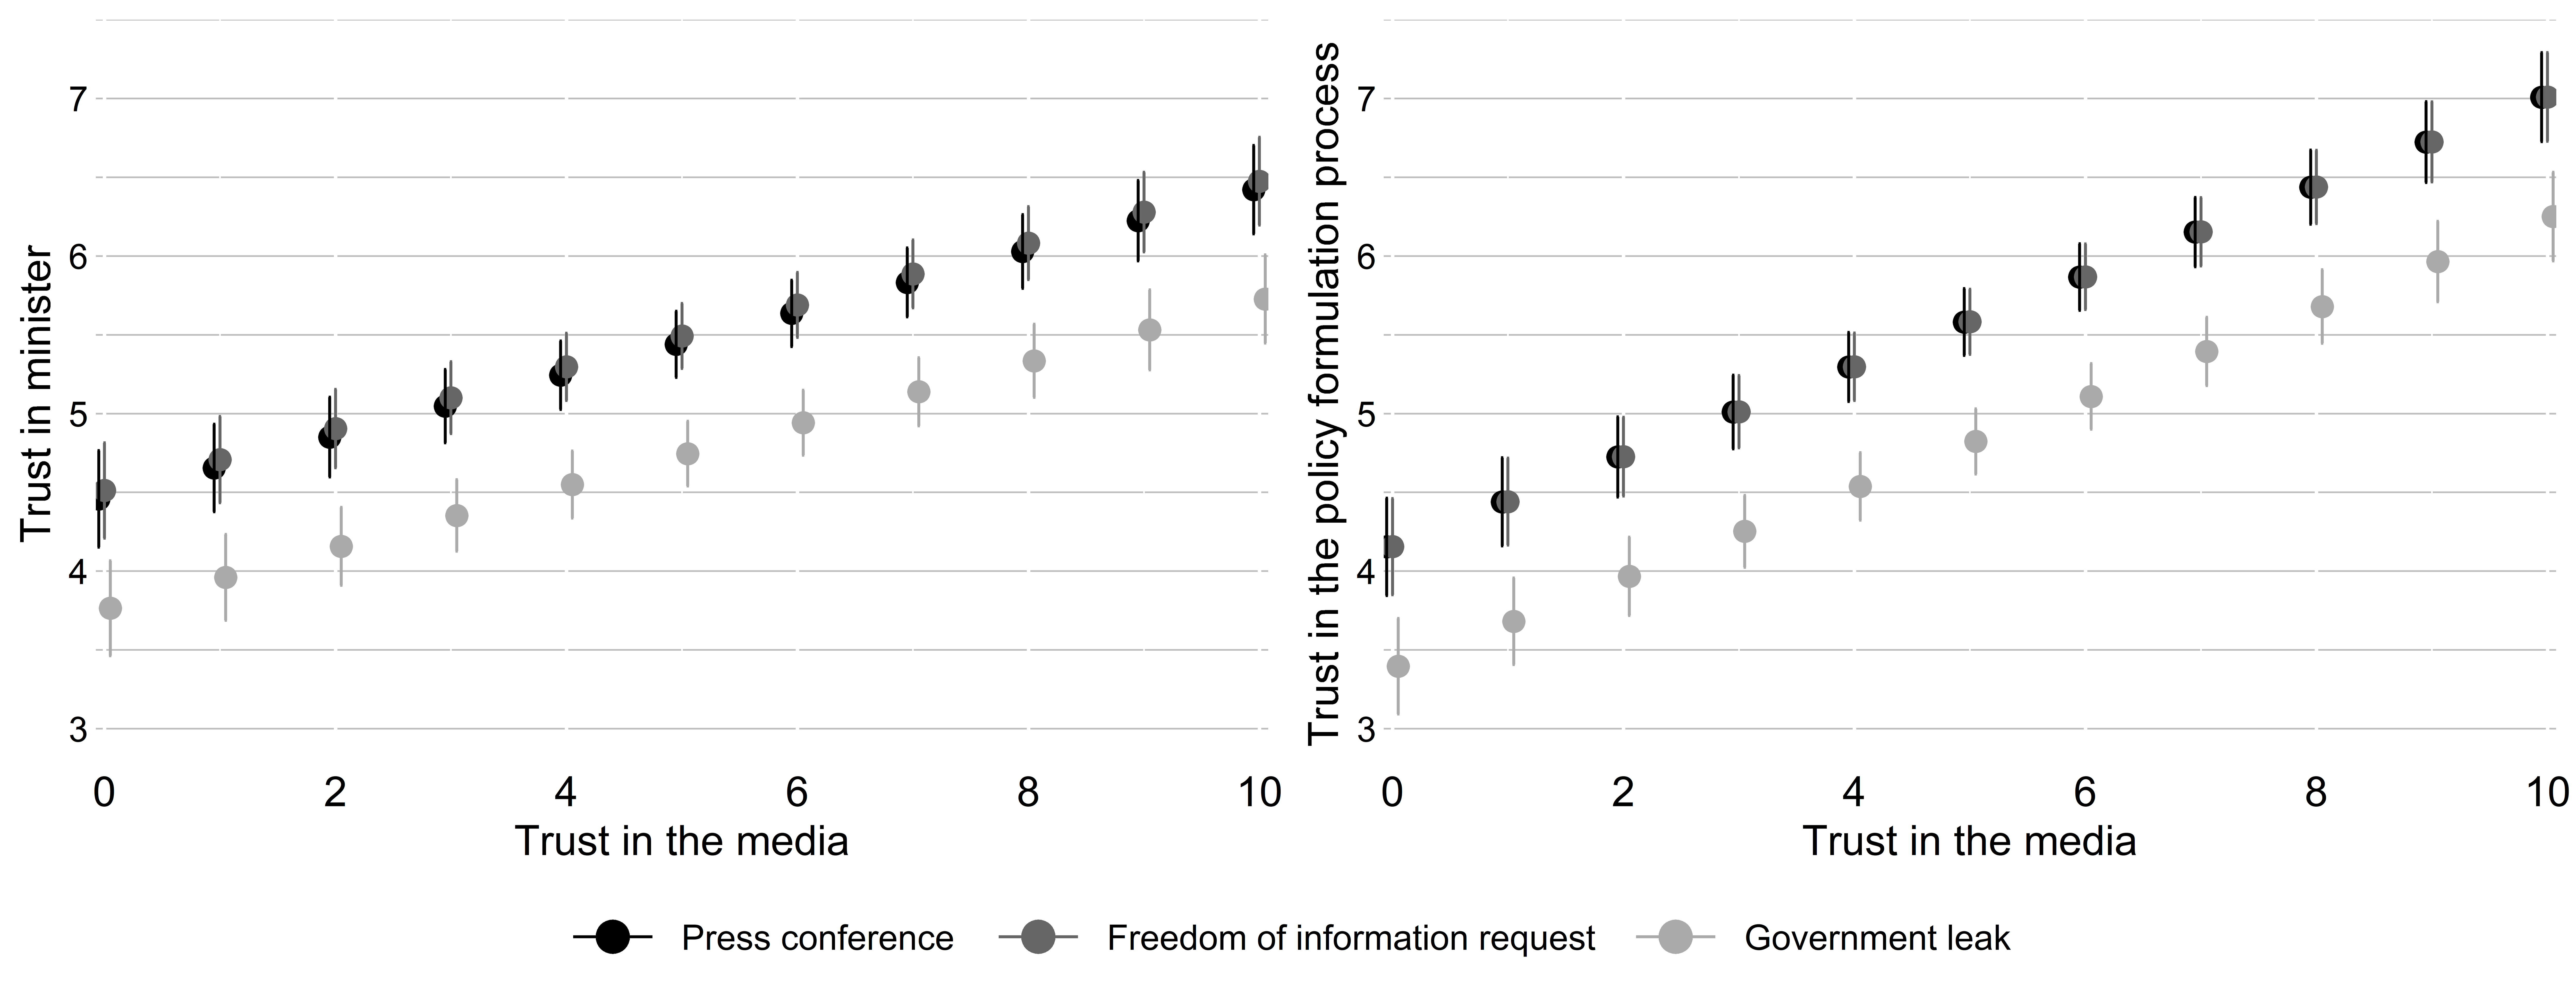** |
| **Note:** The underlying models are reported in the Table 11. |

| Table 11 Voters’ trust in the minister and the policy formulation process (Figure 5) | | |
| --- | --- | --- |
|  | **Trust in minister** | **Trust in policy formulation process** |
| Disclosure: freedom of information request1 | 0.050 (0.216) | -0.130 (0.217) |
| Disclosure: government leak1 | -0.749 (0.210)*** | -0.744 (0.211)*** |
| Trust in depicted non-state actors | 0.196 (0.021)*** | 0.285 (0.021)*** |
| Disclosure: freedom of information request1 × Respondent: trust in the media | 0.001 (0.042) | 0.029 (0.043) |
| Disclosure: government leak1 × Respondent: trust in the media | 0.012 (0.042) | -0.003 (0.042) |
| Respondent: trust in the media | 0.090 (0.033)** | 0.126 (0.033)*** |
| Respondent vote intention: Centre Party | -0.102 (0.130) | -0.429 (0.131)** |
| Gender homophily between minister and respondent | -0.058 (0.080) | -0.019 (0.081) |
| Language homophily between minister and respondent | 0.077 (0.080) | 0.066 (0.081) |
| Respondent: trust in the federal government | 0.181 (0.031)*** | 0.120 (0.031)*** |
| Respondent: trust in the federal administration | 0.123 (0.034)*** | 0.083 (0.034)* |
| Respondent income: get along very well2 | -0.086 (0.125) | 0.100 (0.126) |
| Respondent income: only manage with difficulty2 | -0.146 (0.099) | -0.082 (0.100) |
| Respondent income: only manage with great difficulty2 | -0.554 (0.191)** | -0.547 (0.193)** |
| Respondent: educational level (ISCED-11) | -0.032 (0.025) | -0.027 (0.025) |
| Respondent: woman | -0.003 (0.084) | -0.096 (0.084) |
| Respondent: age | 0.002 (0.003) | -0.002 (0.003) |
| Intercept | 2.456 (0.256)*** | 2.704 (0.257)*** |
| Disclosure: freedom of information request | 0.050 (0.216) | -0.130 (0.217) |
| R2 / Adj. R2 | 0.322 / 0.317 | 0.338 / 0.332 |
| Notes: ***p < 0.001; **p < 0.01; *p < 0.05. N = 2201. Baselines: 1 = press conference; 2 = get along well | | |

# A6 Sociodemographics and the information disclosure mode

To further assess the generalisability of citizens’ responses to different modes of information disclosure, it is helpful to examine heterogeneity across key sociodemographic groups. The following analyses consider subgroup patterns by (1) gender, (2) age, (3) education, (4) income situation, and (5) ideology.

## **A6.1 Gender**

The patterns displayed in Figure 6 indicate that gendered heterogeneity in responses to different modes of information disclosure is limited. Across both outcome measures; trust in the minister and trust in the policy formulation process, none of the disclosure modes produces statistically significant differences between men and women. At the same time, women exhibit a modest, albeit not statistically significant, tendency to respond more critically to leaks than men. This pattern is broadly consistent with prior research suggesting that women tend to evaluate irregular or norm-violating behaviour, such as corruption, more critically than men (e.g. Torgler and Valev 2010; Swamy et al. 2001).

| Figure 6 Marginal effects of respondents’ gender × disclosure mode on trust in the minister and in the policy formulation process. |
| --- |
| **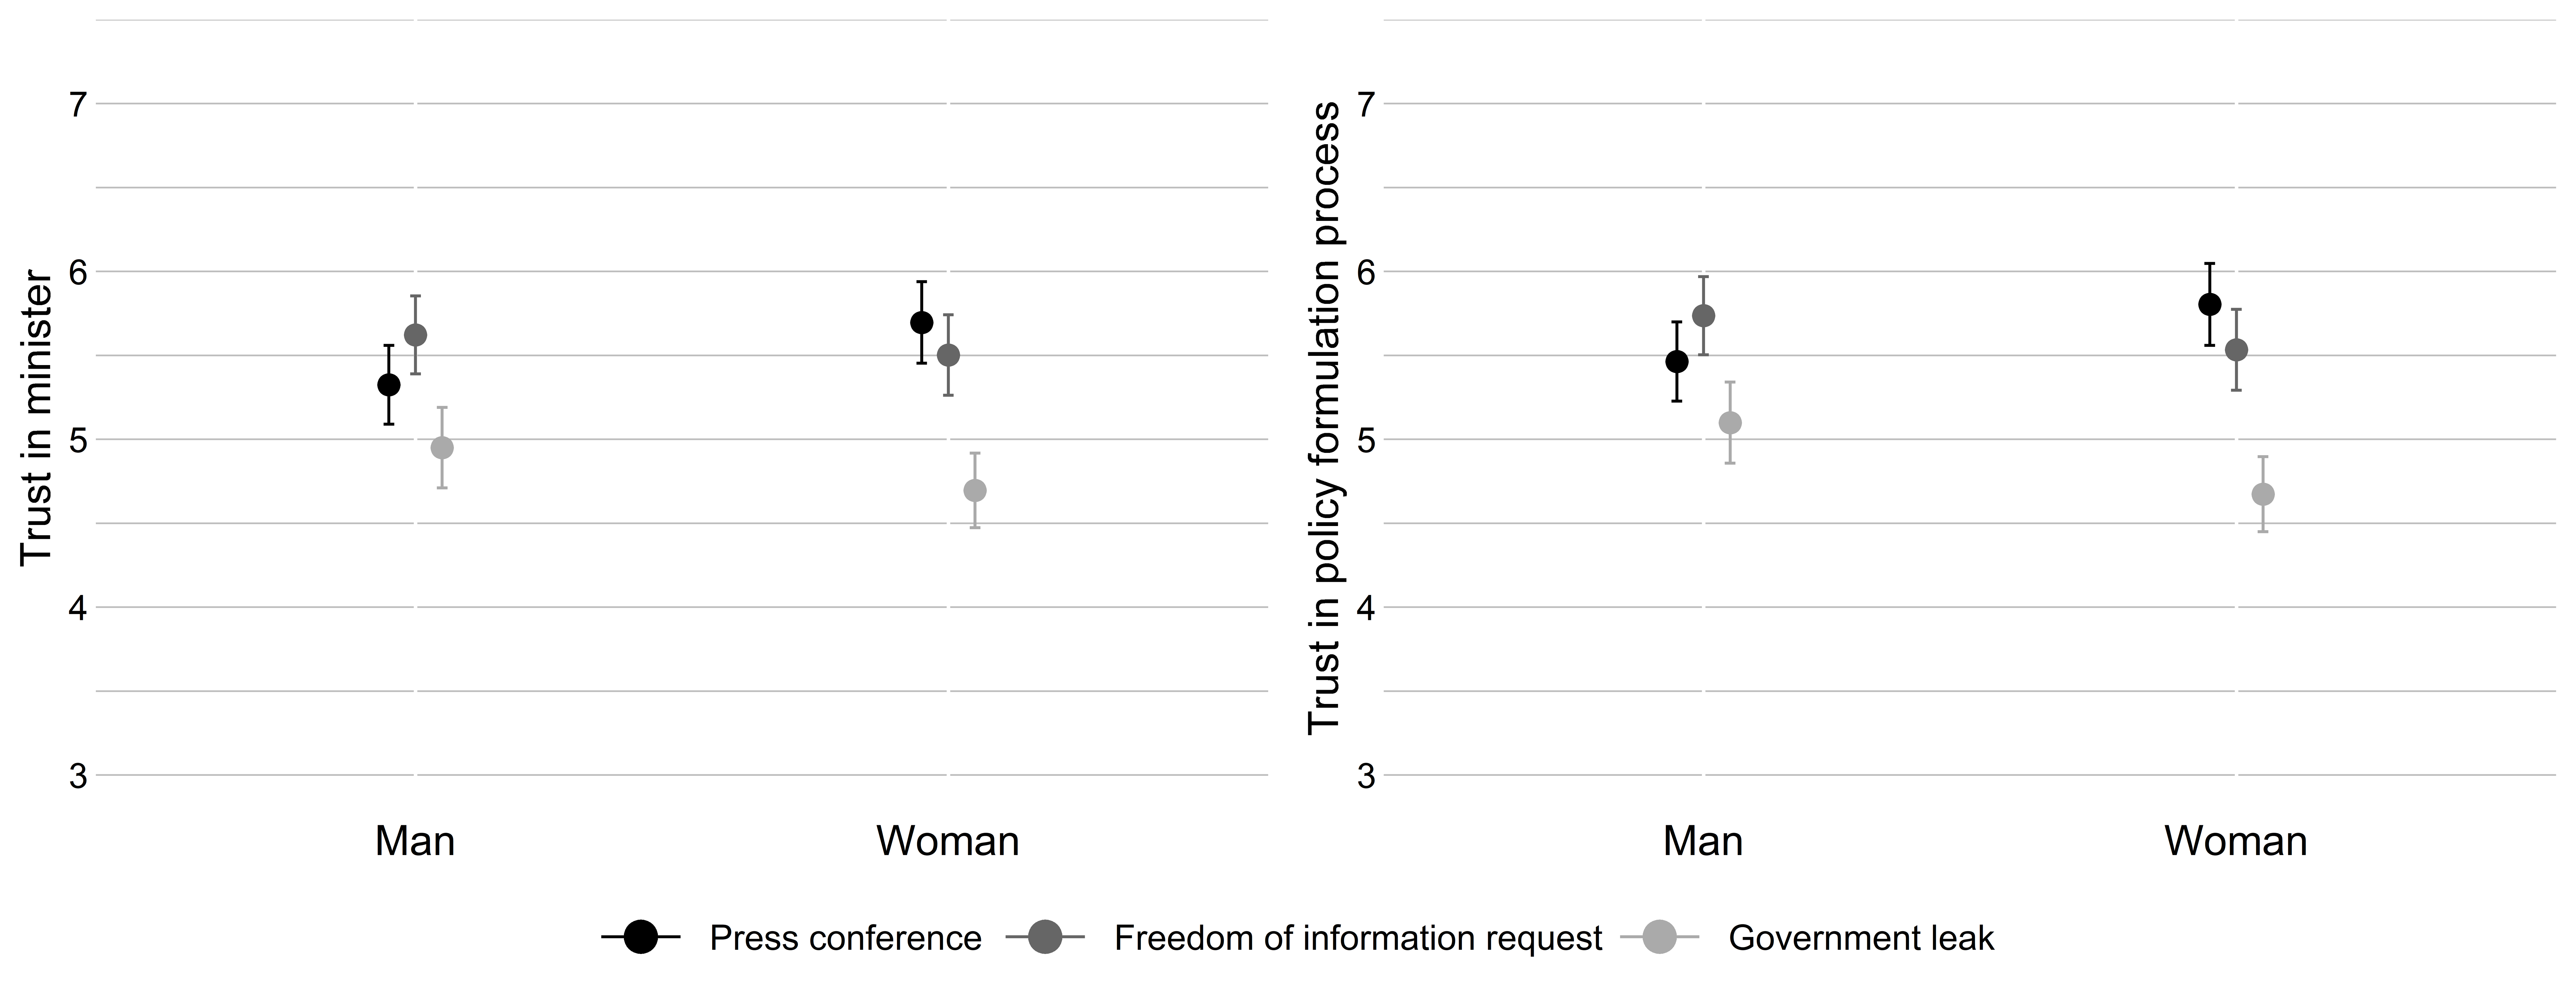** |
| **Note:** The underlying models are reported in the Table 12. |

| Table 12 Voters’ trust in the minister and the policy formulation process (Figure 6) | | |
| --- | --- | --- |
|  | **Trust in minister** | **Trust in policy formulation process** |
| Disclosure: freedom of information request1 | 0.297 (0.140)* | 0.273 (0.140) |
| Disclosure: government leak1 | -0.374 (0.140)** | -0.364 (0.141)** |
| Trust in depicted non-state actors | 0.197 (0.021)*** | 0.287 (0.021)*** |
| Disclosure: freedom of information request1 × Respondent: woman | -0.491 (0.198)* | -0.544 (0.199)** |
| Disclosure: government leak1 × Respondent: woman | -0.625 (0.195)** | -0.767 (0.196)*** |
| Respondent vote intention: Centre Party | -0.106 (0.130) | -0.436 (0.131)*** |
| Gender homophily between minister and respondent | -0.061 (0.080) | -0.023 (0.081) |
| Language homophily between minister and respondent | 0.066 (0.080) | 0.054 (0.081) |
| Respondent: trust in the federal government | 0.177 (0.031)*** | 0.115 (0.031)*** |
| Respondent: trust in the federal administration | 0.124 (0.034)*** | 0.083 (0.034)* |
| Respondent: trust in the media | 0.096 (0.023)*** | 0.135 (0.023)*** |
| Respondent income: get along very well2 | -0.099 (0.125) | 0.090 (0.125) |
| Respondent income: only manage with difficulty2 | -0.145 (0.099) | -0.082 (0.099) |
| Respondent income: only manage with great difficulty2 | -0.572 (0.191)** | -0.566 (0.192)** |
| Respondent: educational level (ISCED-11) | -0.031 (0.025) | -0.026 (0.025) |
| Respondent: woman | 0.371 (0.141)** | 0.341 (0.142)* |
| Respondent: age | 0.002 (0.003) | -0.002 (0.003) |
| Intercept | 2.271 (0.238)*** | 2.470 (0.239)*** |
| R2 / Adj. R2 | 0.326 / 0.321 | 0.342 / 0.337 |
| Notes: ***p < 0.001; **p < 0.01; *p < 0.05. N = 2201. Baselines: 1 = press conference; 2 = get along well | | |

## **A6.2 Age**

Figure 7 illustrates how respondents’ age moderates reactions to different modes of information disclosure. The results reveal no pronounced age-specific patterns. Across all ages, respondents exhibit similarly high levels of trust when information is disclosed via a press conference or a freedom of information request, whereas leaks consistently produce a significantly lower level of trust. If any differences are to be noted, there is an extremely weak tendency for younger respondents to display a somewhat more pronounced trust gap between leaks and the other two disclosure modes.

| Figure 7 Marginal effects of respondents’ age × disclosure mode on trust in the minister and in the policy formulation process. |
| --- |
| **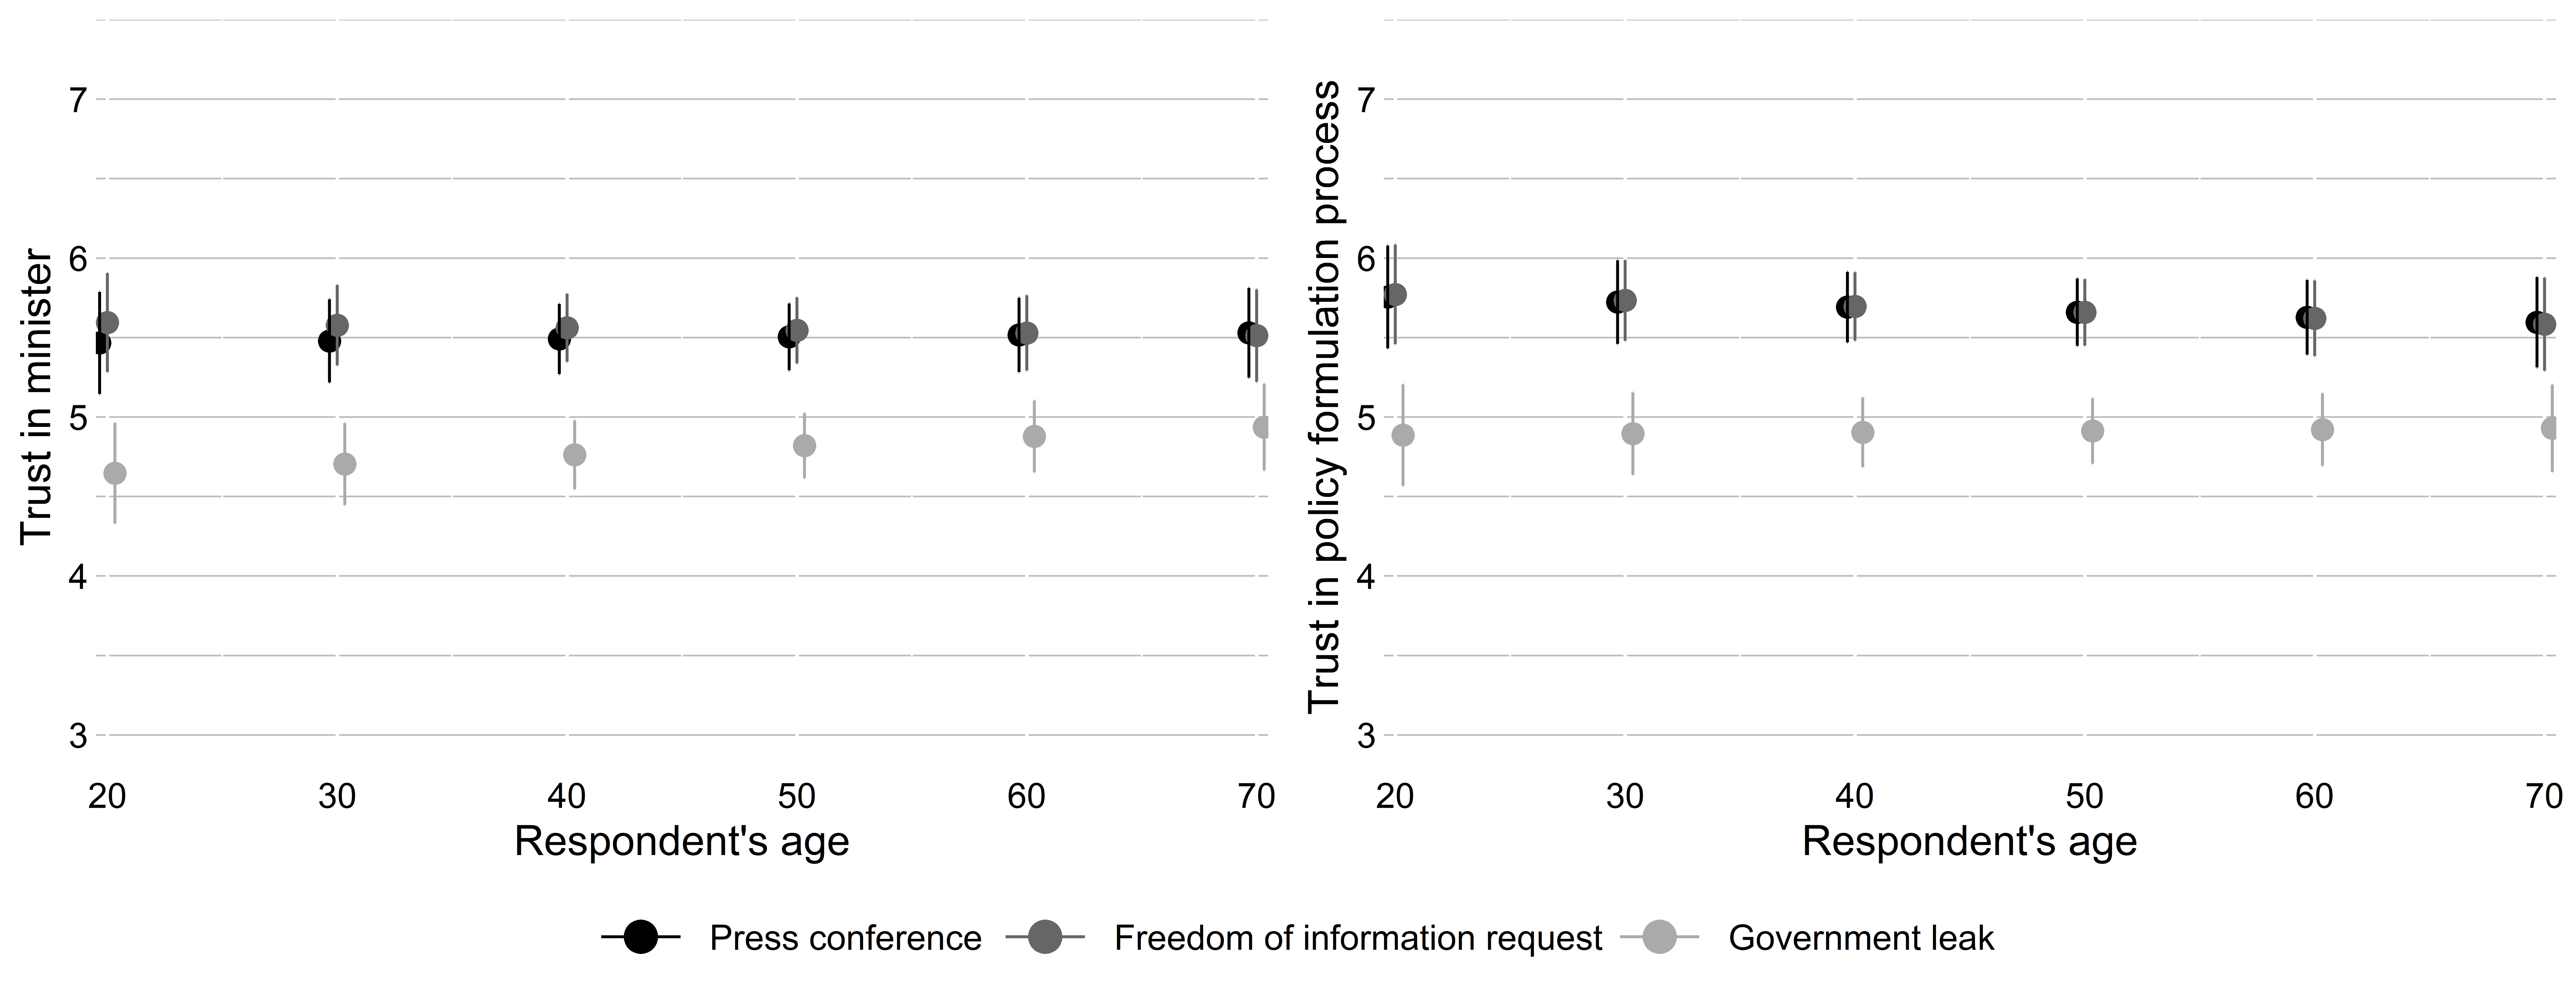** |
| **Note:** The underlying models are reported in the Table 13. |

| Table 13 Voters’ trust in the minister and the policy formulation process (Figure 7) | | |
| --- | --- | --- |
|  | **Trust in minister** | **Trust in policy formulation process** |
| Disclosure: freedom of information request1 | 0.186 (0.308) | 0.028 (0.310) |
| Disclosure: government leak1 | -0.911 (0.306)** | -0.949 (0.308)** |
| Trust in depicted non-state actors | 0.197 (0.021)*** | 0.287 (0.021)*** |
| Disclosure: freedom of information request1 × Respondent: age | -0.003 (0.006) | -0.001 (0.006) |
| Disclosure: government leak1 × Respondent: age | 0.005 (0.006) | 0.004 (0.006) |
| Respondent vote intention: Centre Party | -0.101 (0.130) | -0.428 (0.131)** |
| Gender homophily between minister and respondent | -0.055 (0.080) | -0.017 (0.081) |
| Language homophily between minister and respondent | 0.073 (0.080) | 0.066 (0.081) |
| Respondent: trust in the federal government | 0.181 (0.031)*** | 0.120 (0.031)*** |
| Respondent: trust in the federal administration | 0.124 (0.034)*** | 0.083 (0.034)* |
| Respondent: trust in the media | 0.095 (0.023)*** | 0.134 (0.023)*** |
| Respondent income: get along very well2 | -0.085 (0.125) | 0.104 (0.126) |
| Respondent income: only manage with difficulty2 | -0.147 (0.099) | -0.082 (0.100) |
| Respondent income: only manage with great difficulty2 | -0.556 (0.191)** | -0.545 (0.192)** |
| Respondent: educational level (ISCED-11) | -0.031 (0.025) | -0.027 (0.025) |
| Respondent: woman | -0.001 (0.084) | -0.098 (0.084) |
| Respondent: age | 0.001 (0.004) | -0.003 (0.004) |
| Intercept | 2.462 (0.290)*** | 2.719 (0.292)*** |
| R2 / Adj. R2 | 0.323 / 0.317 | 0.338 / 0.332 |
| Notes: ***p < 0.001; **p < 0.01; *p < 0.05. N = 2201. Baselines: 1 = press conference; 2 = get along well | | |

## **A6.3 Education**

The patterns in Figure 8 depict how respondents’ highest level of educational attainment, measured using the ISCED-11 classification, conditions their responses to different modes of information disclosure. Among respondents with lower levels of education, trust evaluations vary little across the three disclosure modes. By contrast, as educational attainment increases, perceptions of leaks become progressively more negative, which suggests that higher-educated respondents are more sensitive to events of unauthorised information disclosure.

| Figure 8 Marginal effects of respondents’ educational level (ISCED-11) × disclosure mode on trust in the minister and in the policy formulation process. |
| --- |
| **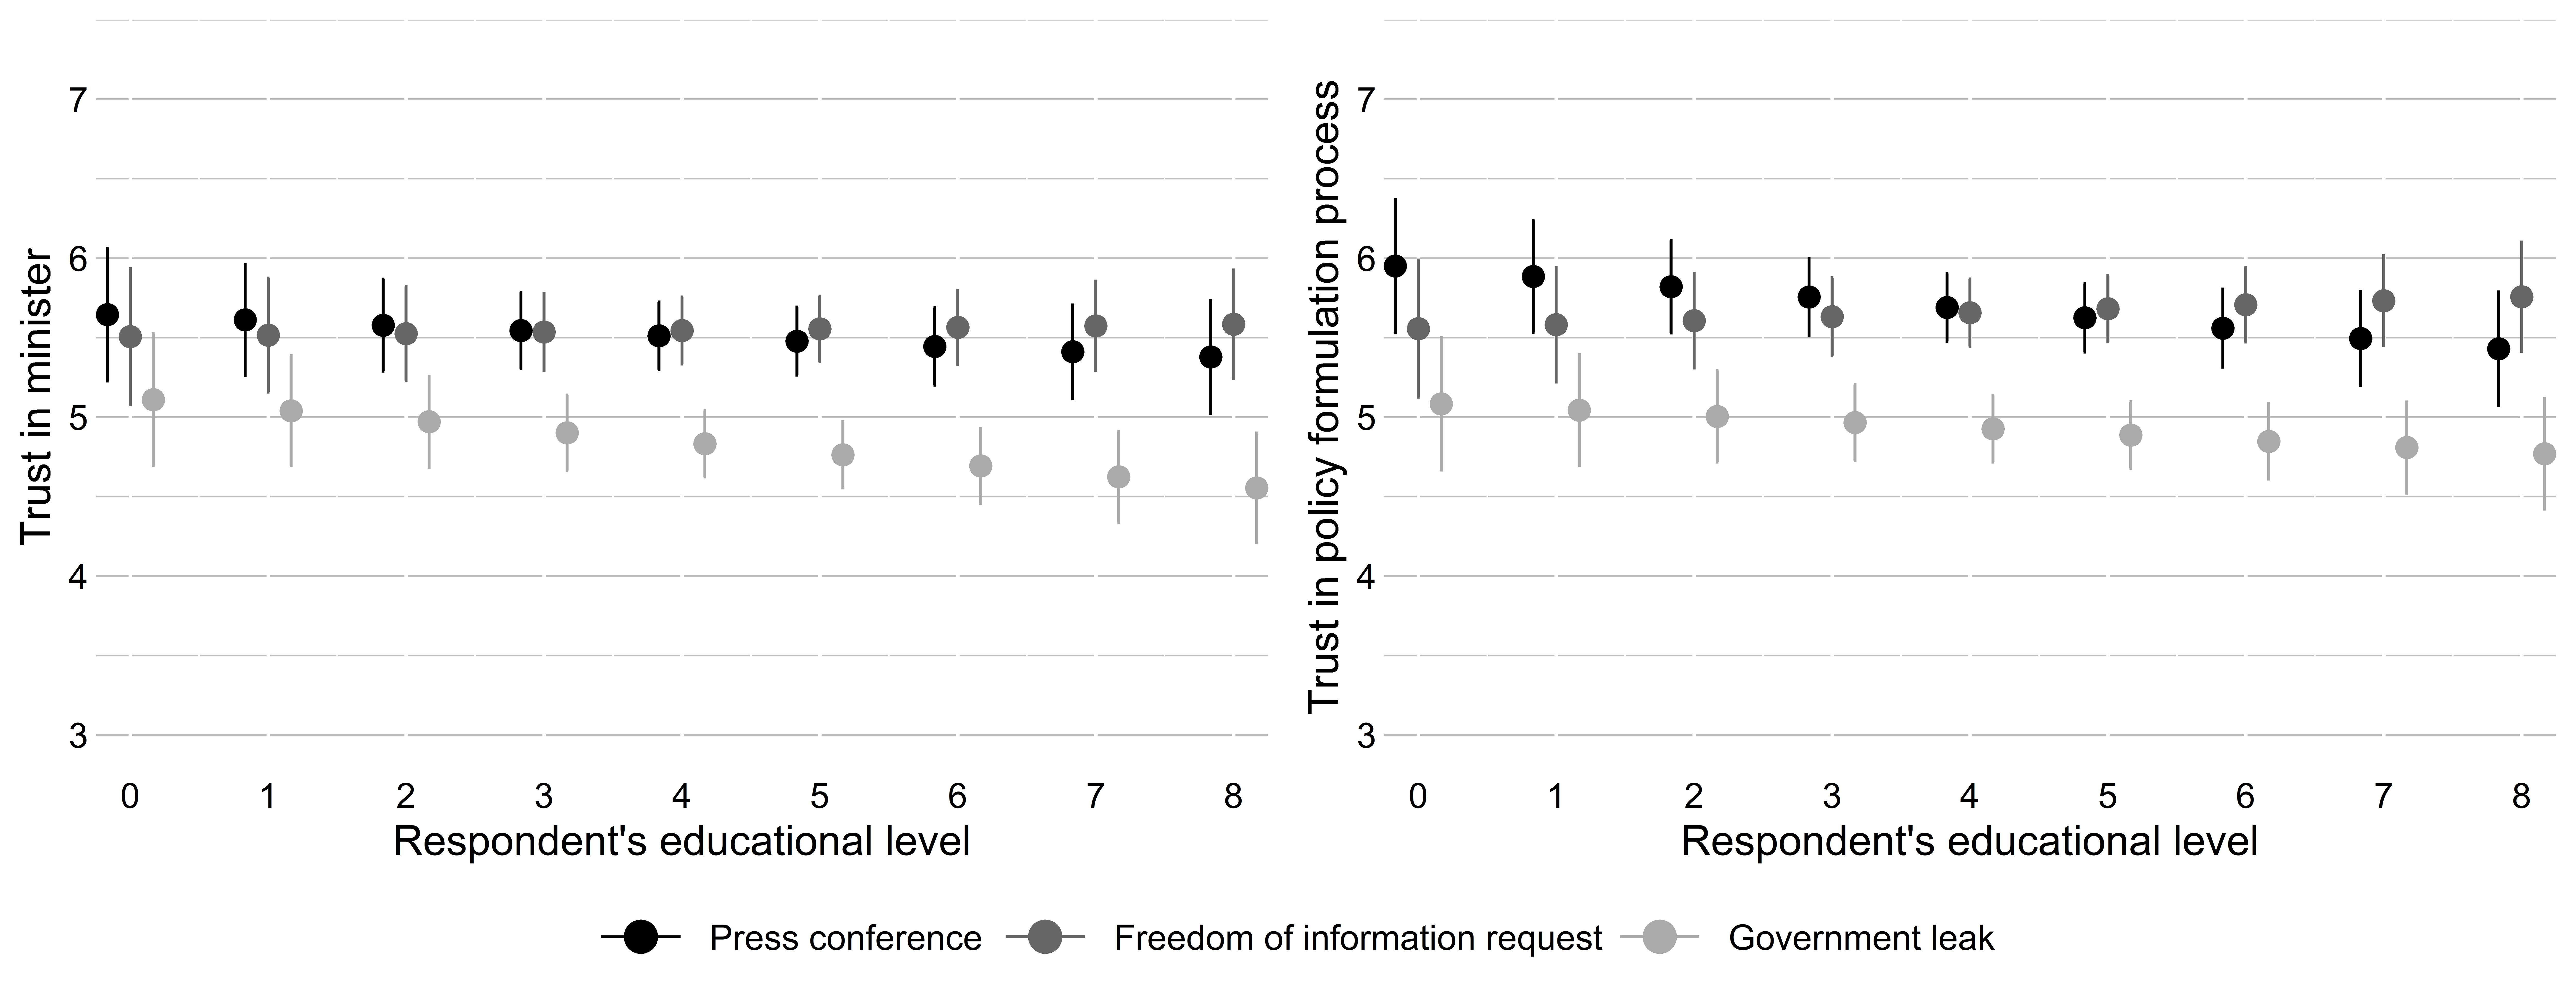** |
| **Note:** The underlying models are reported in the Table 14. |

| Table 14 Voters’ trust in the minister and the policy formulation process (Figure 8) | | |
| --- | --- | --- |
|  | **Trust in minister** | **Trust in policy formulation process** |
| Disclosure: freedom of information request1 | -0.139 (0.270) | -0.394 (0.272) |
| Disclosure: government leak1 | -0.535 (0.267)* | -0.867 (0.269)** |
| Trust in depicted non-state actors | 0.195 (0.021)*** | 0.285 (0.021)*** |
| Disclosure: freedom of information request1 × Respondent: educational level (ISCED-11) | 0.043 (0.057) | 0.090 (0.058) |
| Disclosure: government leak1 × Respondent: educational level (ISCED-11) | -0.036 (0.057) | 0.026 (0.057) |
| Respondent vote intention: Centre Party | -0.101 (0.130) | -0.431 (0.131)** |
| Gender homophily between minister and respondent | -0.057 (0.080) | -0.015 (0.081) |
| Language homophily between minister and respondent | 0.081 (0.080) | 0.070 (0.081) |
| Respondent: trust in the federal government | 0.182 (0.031)*** | 0.120 (0.031)*** |
| Respondent: trust in the federal administration | 0.124 (0.034)*** | 0.084 (0.034)* |
| Respondent: trust in the media | 0.095 (0.023)*** | 0.134 (0.023)*** |
| Respondent income: get along very well2 | -0.095 (0.125) | 0.096 (0.126) |
| Respondent income: only manage with difficulty2 | -0.143 (0.099) | -0.083 (0.100) |
| Respondent income: only manage with great difficulty2 | -0.552 (0.191)** | -0.550 (0.192)** |
| Respondent: educational level (ISCED-11) | -0.033 (0.041) | -0.065 (0.042) |
| Respondent: woman | -0.003 (0.084) | -0.098 (0.084) |
| Respondent: age | 0.002 (0.003) | -0.002 (0.003) |
| Intercept | 2.447 (0.274)*** | 2.833 (0.276)*** |
| R2 / Adj. R2 | 0.323 / 0.318 | 0.338 / 0.333 |
| Notes: ***p < 0.001; **p < 0.01; *p < 0.05. N = 2201. Baselines: 1 = press conference; 2 = get along well | | |

## **A6.4 Income situation**

The role of respondents’ income situation on evaluations of different modes of information disclosure is largely uniform. As shown in Figure 9, the overall pattern – comparable levels of trust for the press conference and freedom of information request scenarios, alongside lower trust for the leak scenario – persists across income groups. Owing to the relatively small number of observations at the extremes of the income distribution (N = 291 for “*getting along very well*” and N = 110 for “*managing with great difficulty*”), differences between disclosure modes do not always attain conventional levels of statistical significance. Nevertheless, a weak, yet notable pattern emerges in that respondents experiencing the greatest financial hardship tend to be the most critical of leaks.

| Figure 9 Marginal effects of respondents’ income situation × disclosure mode on trust in the minister and in the policy formulation process. |
| --- |
| **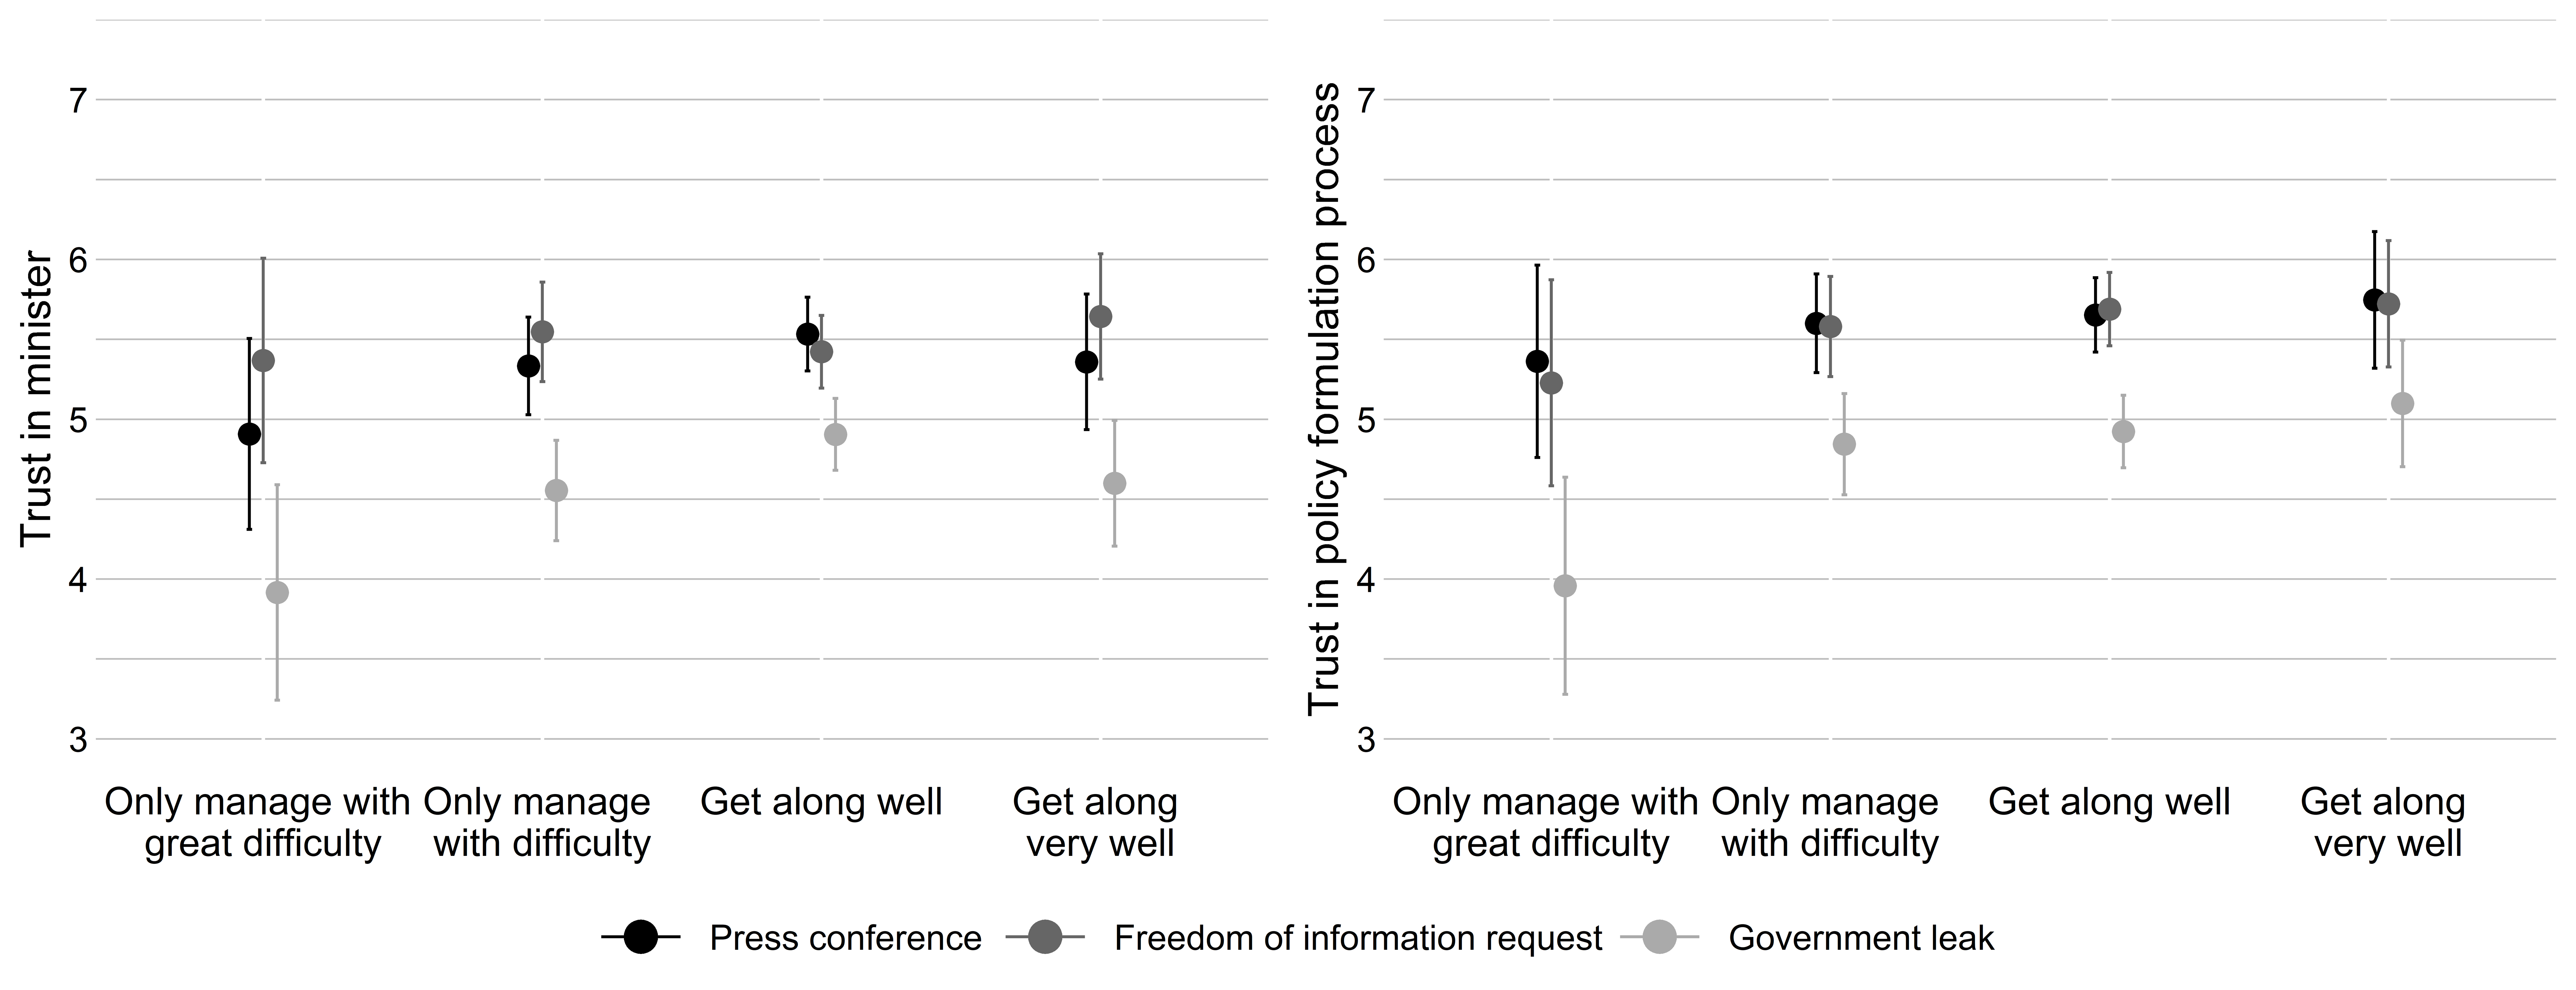** |
| **Note:** The underlying models are reported in the Table 15. |

| Table 15 Voters’ trust in the minister and the policy formulation process (Figure 9) | | |
| --- | --- | --- |
|  | **Trust in minister** | **Trust in policy formulation process** |
| Disclosure: freedom of information request1 | -0.110 (0.132) | 0.036 (0.133) |
| Disclosure: government leak1 | -0.628 (0.128)*** | -0.730 (0.129)*** |
| Trust in depicted non-state actors | 0.196 (0.021)*** | 0.287 (0.021)*** |
| Disclosure: freedom of information request1 × Respondent income: get along very well2 | 0.394 (0.304) | -0.060 (0.306) |
| Disclosure: freedom of information request1 × Respondent income: only manage with difficulty2 | 0.323 (0.237) | -0.056 (0.239) |
| Disclosure: freedom of information request1 × Respondent income: only manage with great difficulty2 | 0.570 (0.450) | -0.171 (0.454) |
| Disclosure: government leak1 × Respondent income: get along very well2 | -0.132 (0.303) | 0.082 (0.306) |
| Disclosure: government leak1 × Respondent income: only manage with difficulty2 | -0.152 (0.236) | -0.027 (0.238) |
| Disclosure: government leak1 × Respondent income: only manage with great difficulty2 | -0.364 (0.464) | -0.675 (0.468) |
| Respondent vote intention: Centre Party | -0.113 (0.130) | -0.429 (0.131)** |
| Gender homophily between minister and respondent | -0.056 (0.080) | -0.021 (0.081) |
| Language homophily between minister and respondent | 0.075 (0.080) | 0.061 (0.081) |
| Respondent: trust in the federal government | 0.184 (0.031)*** | 0.120 (0.031)*** |
| Respondent: trust in the federal administration | 0.125 (0.034)*** | 0.083 (0.034)* |
| Respondent: trust in the media | 0.091 (0.023)*** | 0.134 (0.023)*** |
| Respondent income: get along very well2 | -0.174 (0.223) | 0.094 (0.225) |
| Respondent income: only manage with difficulty2 | -0.199 (0.168) | -0.052 (0.169) |
| Respondent income: only manage with great difficulty2 | -0.625 (0.307)* | -0.290 (0.310) |
| Respondent: educational level (ISCED-11) | -0.033 (0.025) | -0.026 (0.025) |
| Respondent: woman | -0.008 (0.084) | -0.098 (0.084) |
| Respondent: age | 0.002 (0.003) | -0.002 (0.003) |
| Intercept | 2.466 (0.240)*** | 2.633 (0.242)*** |
| R2 / Adj. R2 | 0.325 / 0.318 | 0.338 / 0.332 |
| Notes: ***p < 0.001; **p < 0.01; *p < 0.05. N = 2201. Baselines: 1 = press conference; 2 = get along well | | |

## **A6.5 Ideology**

Lastly, Figure 10 examines how respondents’ ideological self-placement conditions evaluations of different information disclosure modes with regard to their effects on trust in both the minister and the policy formulation process. The figure largely reproduces the key pattern already identified in the main analysis of the paper. What stands out, however, is that stronger left-leaning self-placement is associated with a sharper differentiation between legally sanctioned forms of disclosure – press conferences and freedom of information requests – and leaks. While critical attitudes toward leaks is evident across the ideological spectrum, it is more pronounced among respondents on the left. In this respect, the findings align with previous research showing that left-leaning individuals place greater emphasis on active transparency and information disclosure by public actors (Huwyler, Bailer, and Giger 2025; Tejedo-Romero and Ferraz Esteves Araújo 2023).

| Figure 10 Marginal effects of respondents’ ideology × disclosure mode on trust in the minister and in the policy formulation process. |
| --- |
| **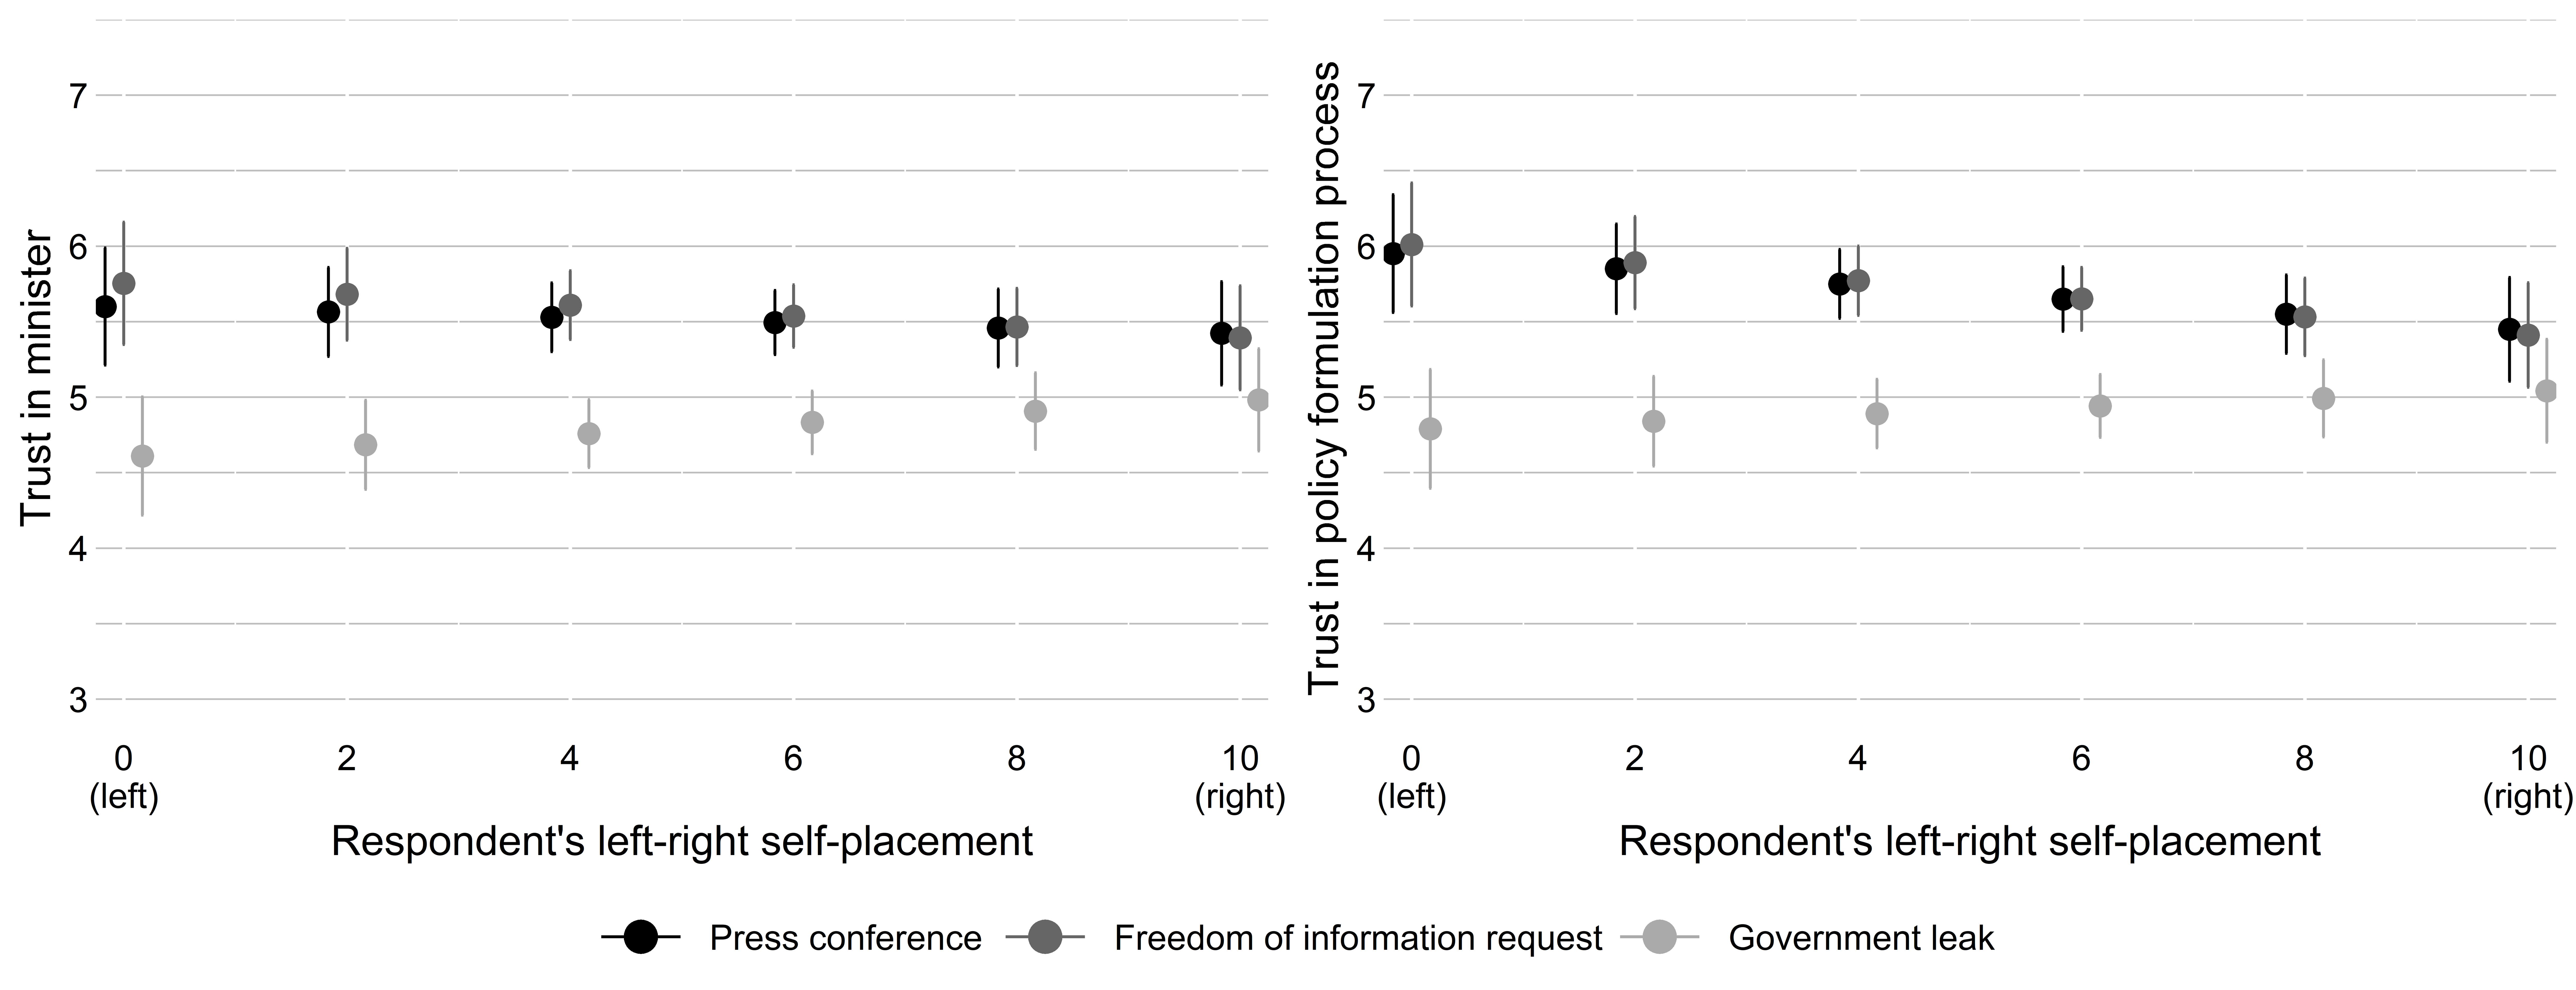** |
| **Note:** The underlying models are reported in the Table 16 Voters’ trust in the minister and the policy formulation process (Figure 10)Table 16Table 13. |

| Table 16 Voters’ trust in the minister and the policy formulation process (Figure 10) | | |
| --- | --- | --- |
|  | **Trust in minister** | **Trust in policy formulation process** |
| Disclosure: freedom of information request1 | 0.154 (0.254) | 0.061 (0.256) |
| Disclosure: government leak1 | -0.990 (0.250)*** | -1.160 (0.251)*** |
| Trust in depicted non-state actors | 0.197 (0.021)*** | 0.286 (0.021)*** |
| Disclosure: freedom of information request1 × Respondent: left-right self-placement | -0.018 (0.044) | -0.010 (0.044) |
| Disclosure: government leak1 × Respondent: left-right self-placement | 0.055 (0.043) | 0.075 (0.043) |
| Respondent vote intention: Centre Party | -0.100 (0.130) | -0.430 (0.131)** |
| Gender homophily between minister and respondent | -0.060 (0.080) | -0.021 (0.081) |
| Language homophily between minister and respondent | 0.075 (0.080) | 0.066 (0.081) |
| Respondent: trust in the federal government | 0.181 (0.031)*** | 0.121 (0.031)*** |
| Respondent: trust in the federal administration | 0.124 (0.034)*** | 0.082 (0.034)* |
| Respondent: trust in the media | 0.094 (0.023)*** | 0.129 (0.023)*** |
| Respondent: left-right self-placement | -0.018 (0.030) | -0.050 (0.031) |
| Respondent income: get along very well2 | -0.091 (0.125) | 0.102 (0.126) |
| Respondent income: only manage with difficulty2 | -0.152 (0.099) | -0.096 (0.100) |
| Respondent income: only manage with great difficulty2 | -0.558 (0.191)** | -0.562 (0.192)** |
| Respondent: educational level (ISCED-11) | -0.032 (0.025) | -0.028 (0.025) |
| Respondent: age | 0.002 (0.003) | -0.002 (0.003) |
| Intercept | 2.540 (0.287)*** | 2.960 (0.289)*** |
| R2 / Adj. R2 | 0.323 / 0.318 | 0.339 / 0.334 |
| Notes: ***p < 0.001; **p < 0.01; *p < 0.05. N = 2201. Baselines: 1 = press conference; 2 = get along well | | |

# References

Huwyler, Oliver, Stefanie Bailer, and Nathalie Giger. 2025. "Transparent Parliamentarians: The Positive Effect of Side Income Disclosure on Voters' Perceptions." *European Journal of Political Research*: 1–18. <https://doi.org/10.1017/S1475676525100303>

Swamy, Anand, Stephen Knack, Young Lee, and Omar Azfar. 2001. "Gender and Corruption." *Journal of Development Economics* 64 (1): 25–55. <https://doi.org/10.1016/S0304-3878(00)00123-1>.

Tejedo-Romero, Francisca, and Joaquim Filipe Ferraz Esteves Araújo. 2023. "Does Political Ideology Act as a Moderator of Transparency Drivers? An Empirical Analysis of Active Information Disclosure in Local Governments." *Local Government Studies* 49 (3): 519–543. <https://doi.org/10.1080/03003930.2021.2013209>.

Torgler, Benno, and Neven T. Valev. 2010. "Gender and Public Attitudes Toward Corruption and Tax Evasion." *Contemporary Economic Policy* 28 (4): 554–568. <https://doi.org/10.1111/j.1465-7287.2009.00188.x>.
